# Supplementary material
Source: Springer Nature journal article supplement (https://www.springermedizin.de/resource/supplementary/12979_2009_68_MOESM2_ESM.pdf/9603326)

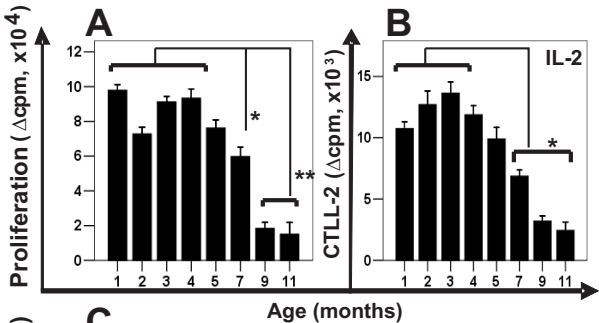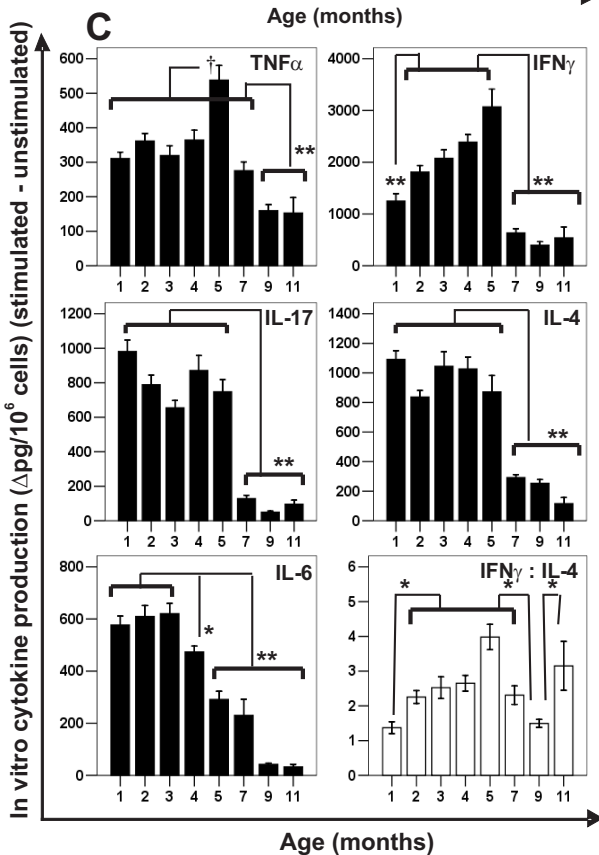

Supplement: MOESM2 [file 9603326]
